# Supplementary material for: RICTOR involvement in the PI3K/AKT pathway regulation in melanocytes and melanoma
Source: PubMed Central journal article supplement (PMC4695048; doi:10.18632/oncotarget.4866), 2015-08-27
Supplement: oncotarget-06-28120-s001.pdf [file oncotarget-06-28120-s001.pdf]

## SUPPLEMENTARY FIGURES AND SUPPLEMENTARY DATA

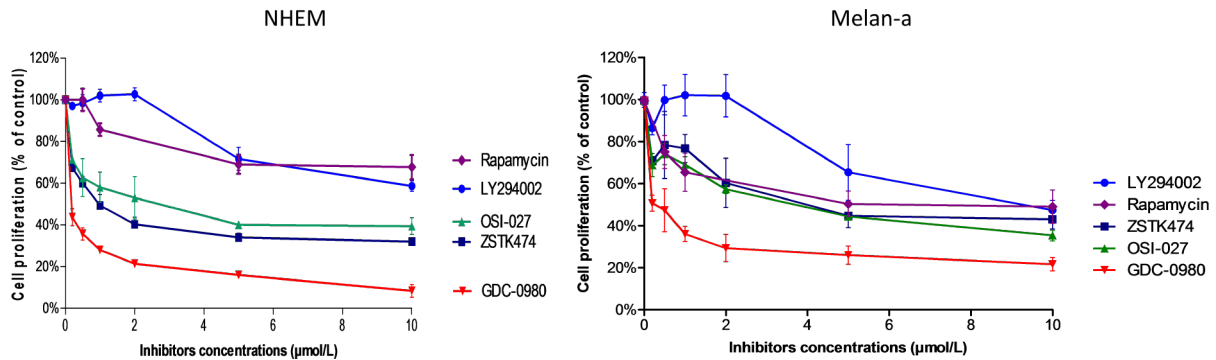

**Supplementary Figure S1: Melanocytes are more sensitive to dual PI3K/mTOR inhibition than single PI3K inhibition.** NHEM or Melan-a were treated for 3 days with different concentrations of LY294002, ZSTK474, rapamycin, OSI-027 or GDC-0980 in their respective growing medium and proliferation was analyzed with CellTiter.

## Traitement with GDC-0980 at 0.5 μM

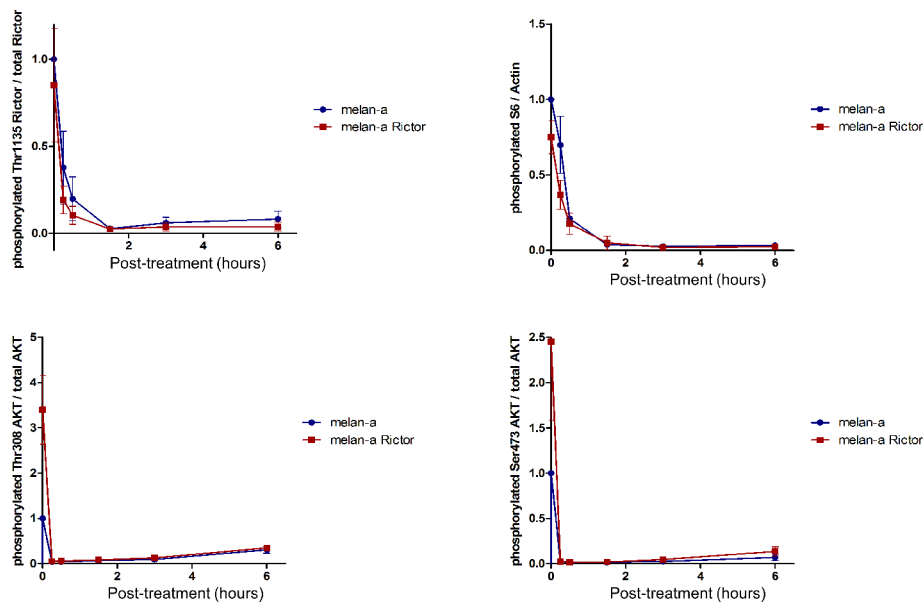

**Supplementary Figure S2: Melan-a transfected with RICTOR and controls both have a stable inhibition of AKT Ser473, RICTOR Thr1135, S6 Ser235/236 phosphorylation upon GDC-0980 treatment.** Melan-a and Melan-a transfected with RICTOR were treated with DMSO (control 0 min) or GDC-0980 at 5 μM for 15 min, 30 min, 1 h30, 3 h or 6 h. Levels of phosphorylated proteins and total proteins were analyzed by Western Blotting and quantified (data are represented as mean +/- SD).

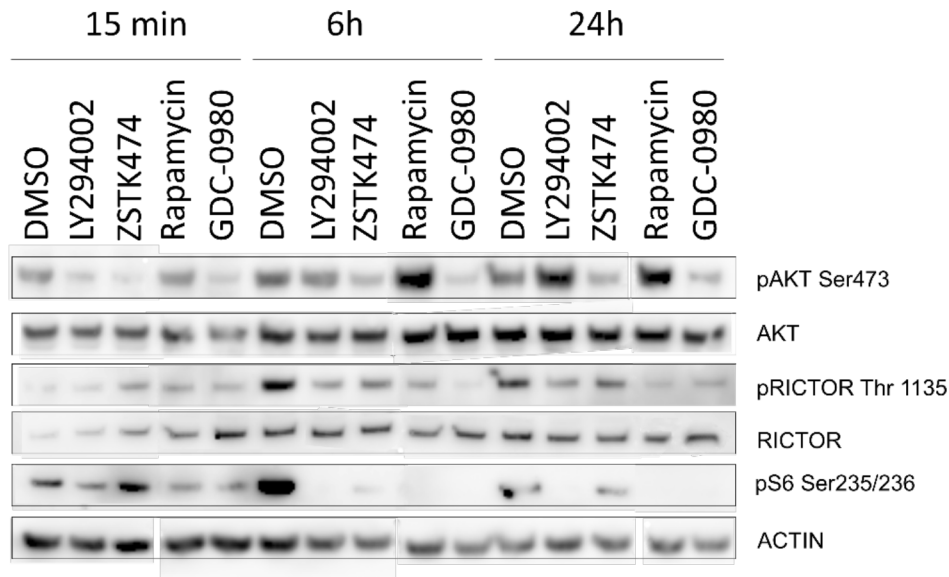

**Supplementary Figure S3: PI3K and mTOR inhibitors inhibits of AKT phosphorylation transiently.** NHEMs were treated for 15 min, 6 hours or 24 hours with DMSO (control), LY294002, ZSTK474, rapamycin or GDC-0980 at respectively 5  $\mu$ M, 0.2  $\mu$ M, 5  $\mu$ M and 0.5  $\mu$ M in growing medium. Level of phosphorylated protein or total protein were analyzed by Western Blotting.

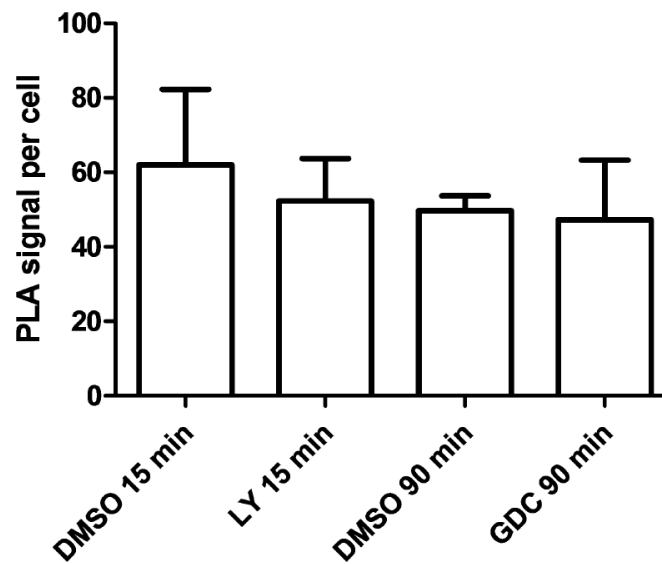

**Supplementary Figure S4: Interaction of AKT with RICTOR is independent of their phosphorylation status.** Melan-a were treated for 15 min or 1 h30 with LY294002 or GDC-0980. Interaction between RICTOR and AKT was determined by PLA and red dots per cell were quantified (data are represented as mean  $\pm$  SD).

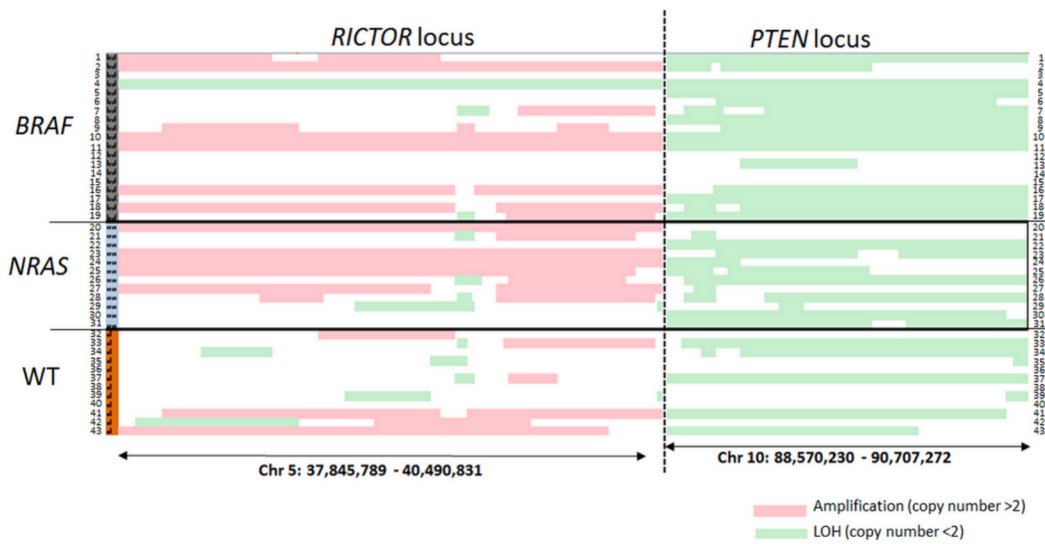

| MUTATION     | AMPLIFICATION AT RICTOR LOCUS | LOH AT PTEN LOCUS    |
|--------------|-------------------------------|----------------------|
| BRAF         | 9 / 19 (47%)                  | 15 / 19 (79%)        |
| NRAS         | 8 / 12 (67%)                  | 7 / 12 (58%)         |
| WT           | 5 / 12 (42%)                  | 5 / 12 (42%)         |
| <b>TOTAL</b> | <b>19 / 43 (44%)</b>          | <b>27 / 43 (63%)</b> |

**Supplementary Figure S5: In BRAF mutated melanoma cell lines, amplification at *RICTOR* locus is associated with LOH at *PTEN* locus.** Short term melanoma cell lines were analysed for amplification or deletion at *RICTOR* and *PTEN* loci. Numbers 1 to 43 indicate cell line number. Red lines correspond to amplification (copy number > 2) and green lines to loss of heterozygosity (copy number < 2).

**Supplementary Table S1: copy number (CN) details on *RICTOR* and *PTEN* loci**
